# Supplementary material for: Investigation of the Volatile Profile of Red Jujube by Using GC-IMS, Multivariate Data Analysis, and Descriptive Sensory Analysis
Source: MDPI journal article supplement (doi:10.3390/foods11030421), 2022-01-31
Supplement: s1 [file s1]

## Supplementary material

**Table S1** Information about six cultivars of red jujube in Xinjiang Province, China

| Code | Cultivar    | Origin              | Traits                                                                              |                                                                                     |                                                                                     |
|------|-------------|---------------------|-------------------------------------------------------------------------------------|-------------------------------------------------------------------------------------|-------------------------------------------------------------------------------------|
| QYX  | Qiyuexian   | Xinjiang, Akesu     |  |  |  |
| JC   | Jinchang    | Xinjiang, Akesu     |  |  |  |
| HTDZ | Hetiandazao | Xinjiang, Khotan    |  |  |  |
| YZ   | Yuanzao     | Xinjiang, Hami      |  |  |  |
| HZ   | Huizao      | Xinjiang, Charkhlik |  |  |  |
| JZ   | Junzao      | Xinjiang, Khotan    |  |  |  |

Note: Jinchang—'JC', Junzao—'JZ', Huizao—'HZ', Qiyuexian—'QYX', Hetiandazao—'HTDZ', and Yuanzao—'YZ'.

**Table S2** Response characteristics and repeatability of response values of ten sensors in E-nose

| Number | Sensors | Response characteristics                | RSD% |
|--------|---------|-----------------------------------------|------|
| 1      | W1C     | aromatic compounds                      | 0.18 |
| 2      | W5S     | nitroxide                               | 4.54 |
| 3      | W3C     | ammonia and aromatic components         | 0.28 |
| 4      | W6S     | hydrogen selective                      | 0.85 |
| 5      | W5C     | alkanes and aromatic components         | 1.65 |
| 6      | W1S     | methane                                 | 0.81 |
| 7      | W1W     | sulfides                                | 0.65 |
| 8      | W2S     | ethyl alcohol                           | 0.74 |
| 9      | W2W     | aromatic components and organic sulfide | 0.59 |
| 10     | W3S     | alkanes                                 | 0.56 |

RSD: relative standard deviation

**Table S3** The GC-IMS results of the volatile composition of the six red jujube cultivars.

|              | Compound                 | RI      | Rt [sec] | Dt [a.u.] | Concentration( $\mu\text{g/g}$ ) |                   |                        |                   |                   |                   |
|--------------|--------------------------|---------|----------|-----------|----------------------------------|-------------------|------------------------|-------------------|-------------------|-------------------|
|              |                          |         |          |           | Qiyuexian<br>(QYX)               | Jinchang<br>(JC)  | Hetianda zao<br>(HTDZ) | Yuanzao<br>(YZ)   | Huizao<br>(HZ)    | Junzao<br>(JZ)    |
| Acids (14)   | formic acid              | 568.30  | 130.64   | 1.16      | 0.30 $\pm$ 0.08c                 | 0.27 $\pm$ 0.07a  | 0.32 $\pm$ 0.03a       | 0.37 $\pm$ 0.07b  | 0.26 $\pm$ 0.14a  | 0.40 $\pm$ 0.05d  |
|              | hexanoic acid            | 576.70  | 134.37   | 1.18      | 0.26 $\pm$ 0.02ab                | 1.01 $\pm$ 0.04a  | 0.26 $\pm$ 0.08ab      | 0.40 $\pm$ 0.04b  | 1.47 $\pm$ 0.05c  | 0.42 $\pm$ 0.11b  |
|              | propionic acid           | 659.50  | 170.83   | 1.44      | 0.05 $\pm$ 0.02bc                | 0.08 $\pm$ 0.01cd | 0.06 $\pm$ 0.01b       | 0.07 $\pm$ 0.02a  | 0.18 $\pm$ 0.02d  | 0.05 $\pm$ 0.03a  |
|              | acetic acid              | 659.90  | 170.99   | 1.48      | 0.04 $\pm$ 0.01d                 | 0.06 $\pm$ 0.04b  | 0.04 $\pm$ 0.01d       | 0.06 $\pm$ 0.04c  | 0.07 $\pm$ 0.01a  | 0.04 $\pm$ 0.01c  |
|              | isobutyric acid          | 749.20  | 234.36   | 1.56      | 0.58 $\pm$ 0.02ab                | 1.26 $\pm$ 0.02b  | 0.55 $\pm$ 0.02a       | 0.73 $\pm$ 0.01b  | 2.52 $\pm$ 0.02c  | 0.83 $\pm$ 0.01c  |
|              | 3-methyl butanoic acid   | 749.20  | 234.36   | 1.45      | 0.14 $\pm$ 0.02ab                | 0.37 $\pm$ 0.05a  | 0.13 $\pm$ 0.02a       | 0.22 $\pm$ 0.04c  | 0.62 $\pm$ 0.02b  | 0.27 $\pm$ 0.01c  |
|              | pentanoic acid           | 844.30  | 333.33   | 1.61      | 2.16 $\pm$ 0.03bc                | 1.30 $\pm$ 0.03ab | 2.83 $\pm$ 0.05a       | 2.26 $\pm$ 0.05a  | 0.96 $\pm$ 0.03c  | 1.73 $\pm$ 0.04d  |
|              | 3-heptenoic acid         | 1055.60 | 692.06   | 1.53      | 3.22 $\pm$ 0.02d                 | 9.07 $\pm$ 0.01c  | 3.26 $\pm$ 0.01c       | 4.62 $\pm$ 0.02d  | 10.95 $\pm$ 0.02b | 4.68 $\pm$ 0.04a  |
|              | crotonic acid            | 807.30  | 290.37   | 1.41      | 1.91 $\pm$ 0.01c                 | 2.82 $\pm$ 0.01b  | 1.90 $\pm$ 0.02c       | 2.03 $\pm$ 0.02b  | 1.84 $\pm$ 0.01a  | 1.92 $\pm$ 0.04c  |
|              | nonanoic acid            | 1024.20 | 632.73   | 1.39      | 0.21 $\pm$ 0.01b                 | 0.54 $\pm$ 0.01a  | 0.74 $\pm$ 0.01b       | 0.65 $\pm$ 0.03a  | 1.24 $\pm$ 0.02a  | 0.15 $\pm$ 0.02b  |
|              | 7-octenoic acid          | 905.90  | 414.10   | 1.23      | 0.04 $\pm$ 0.01c                 | 0.08 $\pm$ 0.00bc | 0.05 $\pm$ 0.01bc      | 0.09 $\pm$ 0.01b  | 0.16 $\pm$ 0.01a  | 0.06 $\pm$ 0.01d  |
|              | n-decanoic acid          | 887.30  | 383.31   | 1.56      | 0.05 $\pm$ 0.01b                 | 0.06 $\pm$ 0.01a  | 0.08 $\pm$ 0.01b       | 0.07 $\pm$ 0.02b  | 0.07 $\pm$ 0.01a  | 0.06 $\pm$ 0.03b  |
|              | heptanoic acid           | 1219.70 | 1002.43  | 1.54      | 0.96 $\pm$ 0.02b                 | 1.19 $\pm$ 0.01a  | 1.32 $\pm$ 0.04b       | 1.62 $\pm$ 0.05b  | 0.97 $\pm$ 0.02a  | 1.20 $\pm$ 0.01b  |
|              | 2-heptenoic acid         | 1012.90 | 611.23   | 2.11      | 0.10 $\pm$ 0.01e                 | 0.25 $\pm$ 0.01b  | 0.17 $\pm$ 0.01d       | 0.08 $\pm$ 0.02c  | 0.46 $\pm$ 0.04a  | 0.41 $\pm$ 0.01e  |
| Alcohols (6) | Total                    |         |          |           | 10.02 $\pm$ 0.29f                | 18.36 $\pm$ 0.32c | 11.71 $\pm$ 0.33e      | 13.27 $\pm$ 0.44d | 21.77 $\pm$ 0.42b | 22.22 $\pm$ 0.42a |
|              | ethanol                  | 532.50  | 114.88   | 1.16      | 2.31 $\pm$ 0.14b                 | 3.15 $\pm$ 0.04ab | 3.00 $\pm$ 0.03a       | 2.53 $\pm$ 0.02ab | 3.06 $\pm$ 0.17a  | 1.71 $\pm$ 0.09b  |
|              | E-2-hexenol              | 730.10  | 218.38   | 1.47      | 0.14 $\pm$ 0.01e                 | 0.44 $\pm$ 0.02b  | 0.18 $\pm$ 0.01e       | 0.17 $\pm$ 0.04d  | 0.83 $\pm$ 0.07a  | 0.25 $\pm$ 0.03c  |
|              | 1-octen-3-ol             | 771.00  | 252.57   | 1.26      | 0.09 $\pm$ 0.02c                 | 0.18 $\pm$ 0.04b  | 0.11 $\pm$ 0.03c       | 0.08 $\pm$ 0.02c  | 0.26 $\pm$ 0.02a  | 0.12 $\pm$ 0.01c  |
|              | 5-methyl-2-furanmethanol | 1041.70 | 665.70   | 1.14      | 0.77 $\pm$ 0.01e                 | 1.14 $\pm$ 0.02b  | 0.66 $\pm$ 0.01d       | 0.63 $\pm$ 0.01de | 0.78 $\pm$ 0.04a  | 0.80 $\pm$ 0.01c  |

|               |                         |         |        |      |             |              |             |              |             |             |
|---------------|-------------------------|---------|--------|------|-------------|--------------|-------------|--------------|-------------|-------------|
| Aldehydes(11) | 6-methyl-5-hepten-2-ol  | 650.60  | 166.89 | 1.28 | 0.19±0.00e  | 0.1±0.01b    | 0.28±0.00e  | 0.15±0.01d   | 0.07±0.02a  | 0.09±0.03c  |
|               | 1-nonen-4-ol            | 812.20  | 296.10 | 1.79 | 0.16±0.00cd | 0.19±0.03b   | 0.22±0.02c  | 0.15±0.02d   | 0.11±0.00a  | 0.24±0.05d  |
|               | Total                   |         |        |      | 3.66±0.18bc | 5.20±0.16a   | 4.45±0.97ab | 3.71±0.12bc  | 5.11±0.54a  | 3.21±0.22d  |
|               | butanal                 | 563.50  | 128.57 | 1.22 | 0.54±0.01cd | 0.52±0.01b   | 0.57±0.02c  | 0.52±0.02c   | 0.42±0.05a  | 0.45±0.02d  |
|               | 2-methylbutanal         | 642.20  | 163.20 | 1.20 | 0.53±0.00b  | 0.59±0.00a   | 0.61±0.01a  | 0.62±0.02b   | 0.51±0.03d  | 0.30±0.01c  |
|               | 3-methylbutanal         | 652.10  | 167.55 | 1.35 | 0.10±0.02cd | 0.77±0.01a   | 0.15±0.04c  | 0.09±0.06d   | 0.48±0.02b  | 0.65±0.04d  |
|               | hexanal                 | 742.10  | 228.36 | 1.26 | 0.19±0.01c  | 0.37±0.01e   | 0.25±0.07a  | 0.32±0.07b   | 0.42±0.01f  | 0.17±0.07d  |
|               | furfurol                | 735.80  | 223.09 | 1.09 | 0.19±0.00b  | 0.38±0.02a   | 0.22±0.01bc | 0.21±0.01c   | 0.72±0.01d  | 0.15±0.01e  |
|               | benzaldehyde            | 815.40  | 299.81 | 0.95 | 0.03±0.03e  | 0.06±0.08b   | 0.04±0.03e  | 0.03±0.04c   | 0.17±0.01a  | 0.04±0.05d  |
|               | E-2-heptenal            | 973.50  | 538.12 | 1.11 | 0.08±0.01c  | 0.07±0.01b   | 0.10±0.03c  | 0.12±0.01c   | 0.44±0.01a  | 0.06±0.01c  |
|               | E-2-octenal             | 645.60  | 164.68 | 1.31 | 5.38±0.01de | 6.60±0.01b   | 6.71±0.01cd | 6.70±0.01e   | 4.46±0.01a  | 5.12±0.01c  |
|               | n-nonanal               | 890.40  | 386.83 | 1.11 | 0.41±0.02b  | 0.58±0.03e   | 0.44±0.01a  | 0.62±0.02d   | 0.55±0.01f  | 0.43±0.01c  |
|               | phenylacetaldehyde      | 729.40  | 217.77 | 1.44 | 0.46±0.01c  | 0.54±0.01a   | 0.71±0.01bc | 0.70±0.02c   | 0.46±0.01ab | 0.52±0.03c  |
|               | pentanal                | 1181.60 | 930.25 | 1.82 | 0.02±0.02d  | 0.03±0.01bc  | 0.03±0.01cd | 0.03±0.02a   | 0.07±0.01ab | 0.03±0.01e  |
|               | Total                   |         |        |      | 7.93±0.14e  | 10.51±0.20a  | 9.83±0.25bc | 9.96±0.30b   | 8.70±0.18d  | 7.92±0.27e  |
| Ketones (8)   | acetoin                 | 705.00  | 197.35 | 1.23 | 0.08±0.02d  | 0.09±0.01b   | 0.08±0.01d  | 0.10±0.04c   | 0.24±0.03a  | 0.06±0.01c  |
|               | 6-methyl-5-hepten-2-one | 772.50  | 253.78 | 1.34 | 0.29±0.01c  | 0.18±0.02b   | 0.31±0.01b  | 0.23±0.02c   | 0.15±0.01a  | 0.26±0.02d  |
|               | 1-octen-3-one           | 1059.50 | 699.44 | 1.22 | 0.03±0.03d  | 0.05±0.02b   | 0.04±0.01d  | 0.06±0.02e   | 0.08±0.01a  | 0.04±0.01c  |
|               | 2-pentanone             | 1022.70 | 629.87 | 1.23 | 0.29±0.01d  | 0.66±0.01c   | 0.39±0.01c  | 0.46±0.01b   | 0.84±0.01a  | 0.25±0.01d  |
|               | acetone                 | 1016.50 | 618.22 | 1.90 | 0.76±0.02bc | 1.16±0.07a   | 0.97±0.00bc | 0.65±0.06b   | 1.04±0.20c  | 0.94±0.02bc |
|               | 3-octanone              | 1017.80 | 620.55 | 1.20 | 0.03±0.03b  | 0.05±0.04b   | 0.03±0.02b  | 0.02±0.04b   | 0.08±0.05a  | 0.06±0.03c  |
|               | 2-hexanone              | 921.30  | 442.41 | 1.50 | 0.26±0.01d  | 0.31±0.02b   | 0.29±0.03c  | 0.15±0.01b   | 0.53±0.03a  | 0.82±0.02cd |
|               | 2-heptanone             | 1015.20 | 615.62 | 1.68 | 0.40±0.01d  | 0.18±0.03de  | 0.64±0.01c  | 0.76±0.01b   | 1.00±0.01a  | 0.24±0.04e  |
|               | Total                   |         |        |      | 2.14±0.14bc | 2.68±0.42abc | 2.75±0.46ab | 2.43±0.21bcd | 3.96±0.89a  | 2.67±0.16bc |

|                |                           |         |        |      |             |             |             |              |             |             |
|----------------|---------------------------|---------|--------|------|-------------|-------------|-------------|--------------|-------------|-------------|
| Esters (17)    | methyl acetate            | 545.70  | 120.69 | 1.19 | 2.10±0.03bc | 2.20±0.04ab | 2.15±0.03cd | 2.07±0.04d   | 1.33±0.12b  | 2.04±0.01b  |
|                | ethyl acetate             | 583.80  | 137.48 | 1.24 | 0.58±0.09b  | 0.60±0.06a  | 0.63±0.06a  | 0.39±0.06a   | 0.53±0.30c  | 0.33±0.03c  |
|                | ethyl propanoate          | 733.10  | 220.87 | 1.39 | 0.04±0.01d  | 0.11±0.01e  | 0.06±0.02b  | 0.05±0.02a   | 0.16±0.01f  | 0.05±0.02c  |
|                | propyl acetate            | 767.10  | 249.34 | 1.23 | 1.46±0.02d  | 2.42±0.06a  | 1.67±0.01b  | 1.42±0.01c   | 1.26±0.01b  | 1.46±0.05d  |
|                | ethyl 2-hydroxypropanoate | 767.70  | 249.84 | 1.54 | 0.35±0.03e  | 0.89±0.02d  | 0.37±0.05b  | 0.36±0.07c   | 1.20±0.01a  | 0.32±0.01e  |
|                | ethyl 3-methylbutyrate    | 746.10  | 231.70 | 1.48 | 0.03±0.01b  | 0.04±0.01d  | 0.03±0.01a  | 0.03±0.01c   | 0.05±0.01e  | 0.03±0.00de |
|                | butyl acetate             | 759.40  | 242.88 | 1.12 | 0.54±0.03b  | 0.63±0.03c  | 0.61±0.01a  | 0.52±0.01b   | 0.40±0.02d  | 0.46±0.03c  |
|                | isoamyl acetate           | 779.20  | 259.43 | 1.08 | 0.85±0.05d  | 2.00±0.01c  | 0.89±0.01b  | 0.82±0.04d   | 1.22±0.03e  | 0.81±0.01a  |
|                | ethyl pentanoate          | 811.90  | 295.77 | 1.46 | 0.28±0.02c  | 0.30±0.00e  | 0.27±0.02b  | 0.25±0.02a   | 0.16±0.01f  | 0.12±0.01d  |
|                | butyrolactone             | 815.40  | 299.81 | 1.37 | 0.58±0.04b  | 1.14±0.06a  | 0.62±0.01b  | 0.90±0.01a   | 1.24±0.03a  | 0.72±0.02b  |
|                | ethyl hexanoate           | 899.10  | 401.57 | 1.34 | 0.02±0.02c  | 0.04±0.03b  | 0.03±0.02a  | 0.02±0.04a   | 0.03±0.06c  | 0.02±0.05bc |
|                | methyl myristoleate       | 881.20  | 376.19 | 1.41 | 0.10±0.01c  | 0.14±0.01b  | 0.13±0.01c  | 0.27±0.02c   | 0.58±0.01a  | 0.09±0.00c  |
|                | methyl hexanoate          | 826.10  | 312.30 | 1.26 | 0.29±0.01e  | 0.20±0.02b  | 0.60±0.01d  | 0.79±0.03c   | 0.14±0.01a  | 0.40±0.01f  |
|                | ethyl benzoate            | 880.50  | 375.38 | 1.33 | 0.05±0.01b  | 0.11±0.01a  | 0.09±0.01b  | 0.07±0.01a   | 0.09±0.01b  | 0.06±0.01b  |
|                | methyl benzoate           | 759.30  | 242.76 | 1.38 | 0.01±0.00c  | 0.12±0.01a  | 0.01±0.00c  | 0.01±0.02c   | 0.10±0.04b  | 0.01±0.01bc |
|                | ethyl heptanoate          | 766.60  | 248.85 | 1.43 | 0.15±0.02b  | 0.25±0.01b  | 0.17±0.01a  | 0.15±0.01b   | 0.21±0.01b  | 0.17±0.01b  |
|                | hexyl butanoate           | 765.20  | 247.72 | 1.47 | 0.08±0.01c  | 0.08±0.01bc | 0.12±0.06a  | 0.09±0.01b   | 0.07±0.03ab | 0.07±0.01bc |
| Terpenoids (6) | Total                     |         |        |      | 7.51±0.41e  | 11.27±0.40a | 8.45±0.34bc | 8.21±0.43bcd | 8.77±0.72b  | 7.16±0.29ef |
|                | gamma-terpinene           | 693.40  | 187.66 | 1.29 | 0.04±0.03d  | 0.05±0.05c  | 0.05±0.03b  | 0.04±0.05a   | 0.06±0.02d  | 0.05±0.07c  |
|                | alpha-phellandrene        | 1055.90 | 692.69 | 1.19 | 0.18±0.02e  | 0.22±0.01c  | 0.20±0.01d  | 0.26±0.01f   | 0.24±0.02a  | 0.09±0.01b  |
|                | myrcene                   | 909.60  | 420.86 | 1.37 | 0.06±0.02de | 0.10±0.01c  | 0.06±0.01cd | 0.04±0.00b   | 0.25±0.03a  | 0.09±0.01f  |
|                | limonene                  | 810.50  | 294.08 | 1.69 | 0.11±0.02d  | 0.08±0.06b  | 0.15±0.02c  | 0.12±0.01e   | 0.06±0.02a  | 0.08±0.02c  |
|                | linalool                  | 766.50  | 248.84 | 1.56 | 0.04±0.01d  | 0.08±0.01b  | 0.05±0.01d  | 0.06±0.01c   | 0.16±0.01a  | 0.05±0.01c  |
|                | o-cymene                  | 783.00  | 262.64 | 1.41 | 1.11±0.02c  | 1.15±0.03c  | 1.09±0.04c  | 1.15±0.02d   | 1.33±0.02b  | 2.76±0.02a  |

|            |                |         |        |      |             |            |             |            |            |            |
|------------|----------------|---------|--------|------|-------------|------------|-------------|------------|------------|------------|
| Furans (2) | Total          |         |        |      | 1.54±0.12de | 1.68±0.17c | 1.60±0.12cd | 1.67±0.10c | 2.10±0.12b | 3.12±0.14a |
|            | 2-acetylfuran  | 970.60  | 532.87 | 1.22 | 0.29±0.01b  | 0.36±0.02b | 0.37±0.01b  | 0.28±0.02b | 0.54±0.02a | 0.24±0.01b |
|            | 2-pentyl furan | 1013.50 | 612.40 | 2.02 | 0.02±0.01d  | 0.03±0.02b | 0.03±0.01c  | 0.04±0.01d | 0.06±0.01a | 0.02±0.01b |
|            | Total          |         |        |      | 0.31±0.02c  | 0.39±0.04b | 0.40±0.02b  | 0.32±0.03c | 0.60±0.03a | 0.26±0.02d |

Mean values with different letters in the same row correspond to significant differences at  $p < 0.05$ . Data are represented as the mean  $\pm$  SD.

GC-IMS: gas chromatography ion mobility spectrometry.

'The six red jujube cultivars' includes Jinchang-'JC', Junzao-'JZ', Huizao-'HZ', Qiyuexian-'QYX', Hetiandazao-'HTDZ', and Yuanzao-'YZ'.

'RI' means 'retention index', 'Rt' means 'retention time', 'Dt' means 'drift time'.

**Table S4** The composition of fatty acids, amino acids, organic acids, and sugars of six red jujube cultivars from Xinjiang Province, China

| Composition      | Concentration(mg/g) |               |                    |               |               |               |
|------------------|---------------------|---------------|--------------------|---------------|---------------|---------------|
|                  | Qiyuexian (QYX)     | Jinchang (JC) | Hetiandazao (HTDZ) | Yuanzao (YZ)  | Huizao (HZ)   | Junzao (JZ)   |
| malic acid       | 105.38±22.54a       | 106.01±18.34a | 131.57±33.67a      | 145.47±43.23a | 154.50±21.34a | 159.01±54.42a |
| citric acid      | 22.87±3.46c         | 31.29±4.56bc  | 25.75±6.76bc       | 34.67±4.32b   | 23.96±3.50c   | 44.97±7.67a   |
| quinic acid      | 91.37±10.22a        | 92.26±10.23a  | 100.67±12.89a      | 106.79±20.98a | 111.19±23.56a | 112.84±18.76a |
| lactic acid      | 56.38±6.44c         | 61.68±6.46c   | 85.59±7.74b        | 101.80±9.09ab | 116.45±89.76a | 121.84±20.03a |
| tartaric acid    | 55.49±9.87d         | 59.77±5.78d   | 86.97±6.43c        | 105.54±8.90b  | 118.82±9.76ab | 123.57±12.65a |
| glucose          | 126.02±13.45a       | 84.70±7.65c   | 108.37±9.80b       | 87.22±6.73c   | 96.93±7.83bc  | 55.25±4.56d   |
| fructose         | 150.67±1.24a        | 104.24±1.43d  | 121.68±1.23b       | 98.87±1.20e   | 118.61±41.10c | 70.99±1.20f   |
| maltose          | 28.64±3.00a         | 26.07±8.00a   | 27.71±5.00a        | 25.04±2.13a   | 26.15±2.23a   | 20.59±1.80a   |
| capric acid      | 0.22±0.01c          | nd            | nd                 | 0.35±0.01a    | 0.26±0.01b    | 0.26±0.01b    |
| lauric acid      | 1.98±0.01b          | 0.81±0.01e    | 0.77±0.01f         | 2.91±0.01a    | 1.68±0.01c    | 1.21±0.01d    |
| myristic acid    | 2.16±0.01b          | 0.74±0.01e    | 0.68±0.01f         | 3.44±0.02a    | 1.27±0.01c    | 1.16±0.01d    |
| myristoleic acid | 1.45±0.01b          | 0.54±0.01e    | 0.57±0.03d         | 5.08±0.01a    | 0.40±0.01f    | 1.02±0.01c    |
| palmitic acid    | 12.30±0.01b         | 4.44±0.01f    | 4.67±0.01e         | 1.74±0.01a    | 5.47±0.01d    | 7.13±0.01c    |
| palmitoleic acid | 4.28±0.02b          | 2.22±0.02e    | 2.39±0.02d         | 6.35±0.02a    | 1.35±0.02f    | 3.91±0.02c    |
| margaric acid    | nd                  | nd            | 0.02±1.00E-4a      | nd            | nd            | 0.18±0.03b    |
| stearic acid     | 2.32±0.03a          | 0.84±0.03d    | 0.73±0.03e         | 0.14±0.03b    | 0.76±0.03f    | 0.94±0.03c    |

|                      |                  |                  |                  |                  |                  |                  |
|----------------------|------------------|------------------|------------------|------------------|------------------|------------------|
| oleic acid           | 5.89±0.02a       | 0.84±0.002e      | 0.79±0.02e       | 1.43±0.02d       | 0.37±0.02c       | 1.37±0.02b       |
| linoleic acid        | 3.46±0.01a       | 0.71±0.01d       | 0.69±0.01d       | 0.77±0.01b       | 1.04±0.01d       | 1.52±0.01c       |
| arachidic acid       | 0.34±0.01b       | nd               | nd               | 0.28±0.02c       | nd               | 0.21±0.01a       |
| alpha-linolenic acid | 0.28±0.01b       | 0.17±0.01d       | 0.19±0.01d       | 0.20±0.01d       | 0.28±0.01c       | 0.47±0.01a       |
| gamma-linolenic acid | nd               | nd               | nd               | 0.18±0.01a       | nd               | nd               |
| behenic acid         | 0.27±0.01d       | nd               | nd               | nd               | 0.26±0.01e       | 0.31±0.01c       |
| lignoceric acid      | nd               | nd               | nd               | 0.24±0.01a       | nd               | nd               |
| ASP                  | 4.40E-2±2.00E-4c | 3.60E-2±2.00E-4b | 3.30E-2±2.00E-4a | 5.30E-2±2.00E-4e | 2.10E-2±2.00E-4f | 4.20E-2±2.00E-4d |
| THR                  | 0.28±1.00E-3d    | 0.51±1.00E-3a    | 0.48±1.00E-3b    | 0.17±1.00E-3f    | 0.19±1.00E-3e    | 0.34±1.00E-3c    |
| SER                  | nd               | nd               | nd               | nd               | nd               | nd               |
| GLU                  | 1.10E-2±3.00E-4c | 3.20E-2±3.00E-4e | 2.60E-2±3.00E-4e | 3.50E-3±3.00E-4b | 1.30E-2±3.00E-4d | 0.02±3.00E-4a    |
| GLY                  | 4.90E-3±1.00E-4d | 5.50E-3±1.00E-4a | 5.90E-3±2.00E-4b | 3.10E-3±2.00E-4f | 3.00E-3±1.00E-4e | 0.0043±1.00E-4c  |
| ALA                  | 1.50E-2±1.00E-4c | 2.80E-2±1.00E-4d | 2.60E-2±1.00E-4b | 5.10E-3±1.00E-4e | 8.00E-3±1.00E-4b | 2.30E-2±1.00E-4a |
| VAL                  | 5.30E-3±4.00E-4d | 4.20E-2±3.00E-4a | 3.70E-2±2.00E-4b | 0.01±2.00E-4e    | 1.40E-2±4.00E-4d | 2.80E-2±1.00E-4c |
| MET                  | nd               | nd               | nd               | nd               | nd               | nd               |
| ILE                  | 0.03±1.00E-4d    | 1.50E-2±1.00E-4b | 1.50E-2±1.00E-4a | 4.70E-2±1.00E-4e | 2.90E-2±1.00E-4c | 5.10E-2±1.00E-4b |
| LEU                  | 2.40E-3±1.00E-4c | 1.90E-2±1.00E-4e | 1.50E-2±1.00E-4e | 1.60E-3±1.00E-4b | 2.00E-3±1.00E-4d | 8.70E-3±1.00E-4a |
| TYR                  | 1.80E-2±2.00E-4d | 1.30E-2±2.00E-4a | 2.10E-2±2.00E-4b | 1.00E-3±2.00E-4f | 0.021±2.00E-4e   | 0.04±2.00E-4c    |
| PHE                  | 9.30E-3±1.00E-4c | 2.20E-2±1.00E-4c | 2.10E-2±2.00E-4b | 1.00E-3±1.00E-4c | 9.20E-3±2.00E-4b | 1.40E-3±1.00E-4a |
| LYS                  | 7.00E-4±1.00E-4d | 4.30E-3±3.00E-4a | 3.90E-3±2.00E-4b | nd               | 2.50E-3±1.00E-4d | 3.90E-3±1.00E-4c |
| HIS                  | nd               | 0.01±1.00E-4c    | 9.30E-3±1.00E-4d | nd               | nd               | 3.10E-3±1.00E-4a |
| ARG                  | 2.30E-2±1.00E-4d | 4.70E-2±1.00E-4b | 5.80E-2±1.00E-4a | nd               | 2.80E-2±1.00E-4c | 4.70E-2±1.00E-4b |

|     |            |            |            |            |            |            |
|-----|------------|------------|------------|------------|------------|------------|
| PRO | 1.70±0.12b | 1.64±0.12b | 1.55±0.12b | 2.25±0.12a | 1.66±0.12b | 2.17±0.12a |
|-----|------------|------------|------------|------------|------------|------------|

nd: not detected. Mean values with different letters in the same row correspond to significant differences at  $p < 0.05$ . Data are represented as the mean  $\pm$  SD.

'E' represents the corresponding power of '10' in the scientific notation of the table.

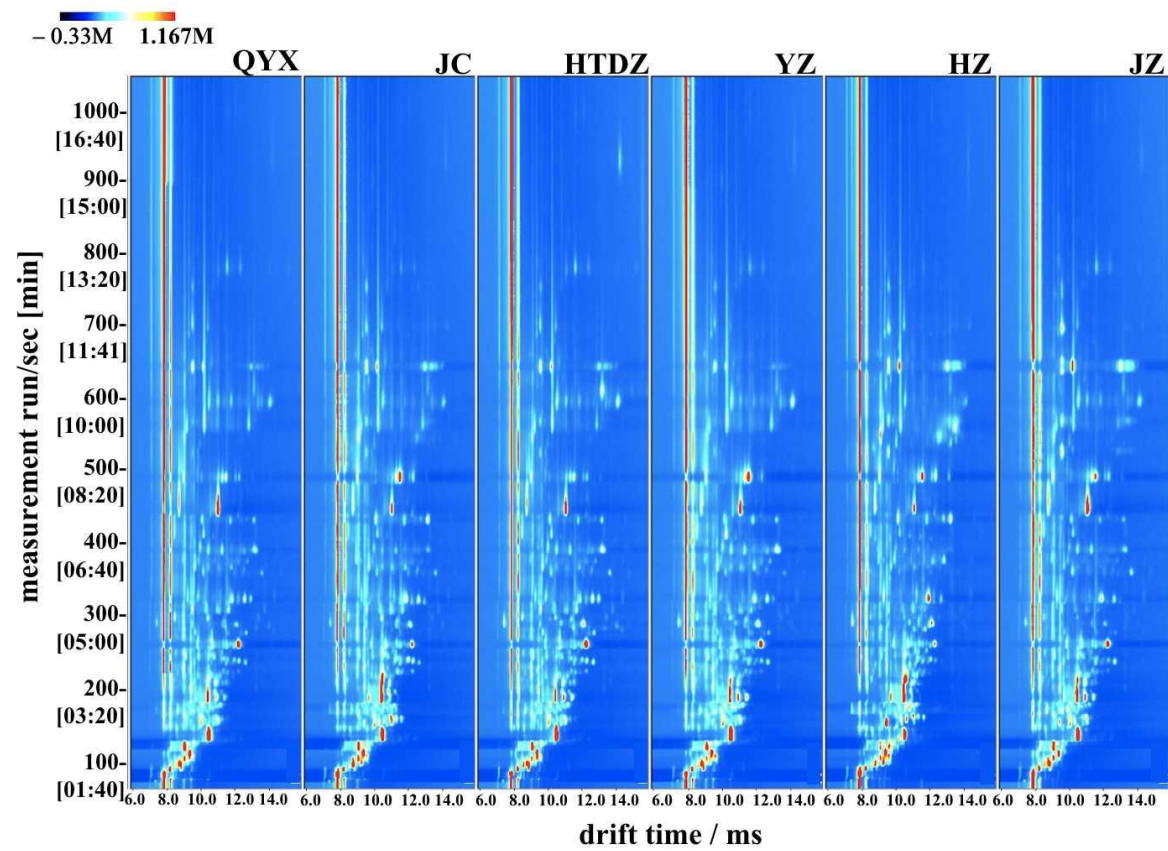

**Figure S1** The combined chromatograms of the six red jujube cultivars in Xinjiang province, China (Jinchang-‘JC’, Junzao-‘JZ’, Huizao-‘HZ’, Qiyuexian-‘QYX’, Hetiandazao-‘HTDZ’, and Yuanzao-‘YZ’)

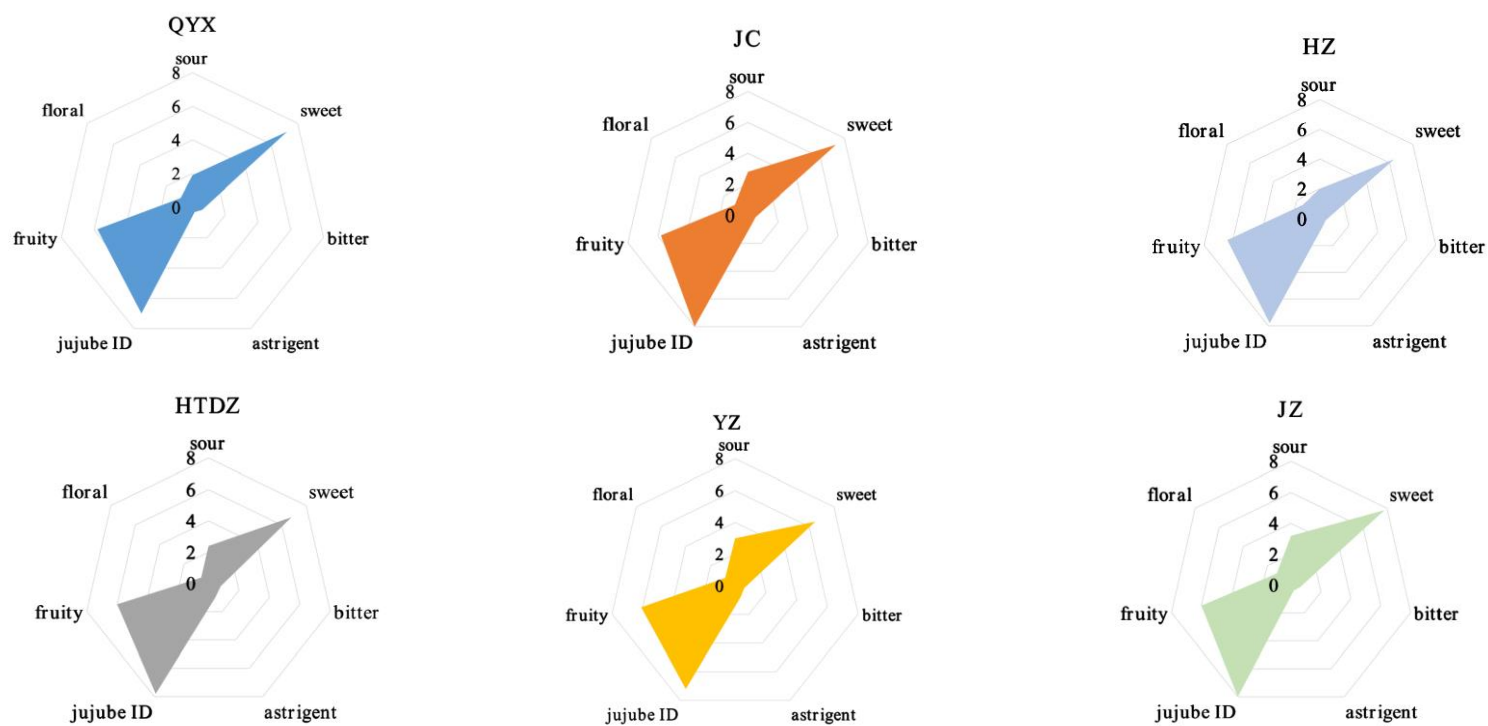

**Figure S2** Sensory profiles of the six red jujube cultivars in Xinjiang province, China (Jinchang-‘JC’, ‘blue color’; Junzao-‘JZ’, ‘orange color’, Huizao-‘HZ’, ‘light blue color’; Qiyuexian-‘QYX’, ‘grey color’; Hetiandazao-‘HTDZ’, ‘light orange color’; and Yuanzao-‘YZ’, ‘green color’)

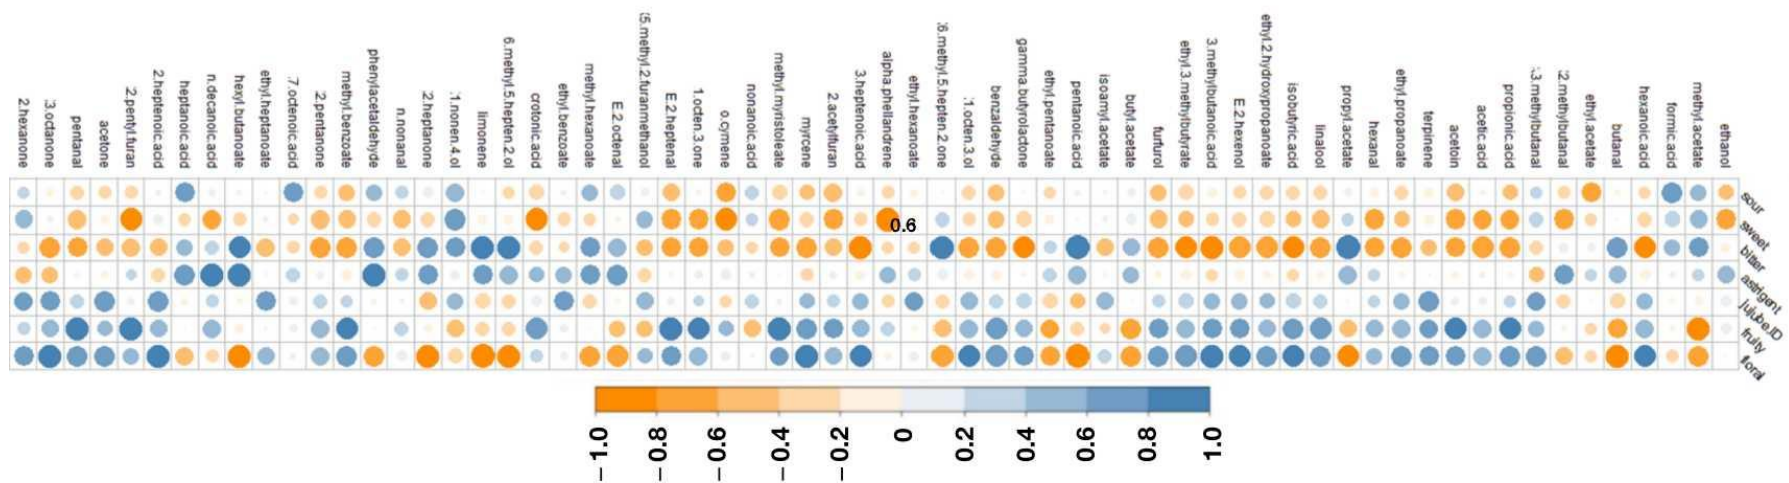

**Figure. S3** Correlation analysis among sensory attributes and VOCs of the six red jujube cultivars from Xinjiang province, China (Jinchang-‘JC’, Junzao-‘JZ’, Huizao-‘HZ’, Qiyuexian-‘QYX’, Hetiandazao-‘HTDZ’, and Yuanzao-‘YZ’)
